# Supplementary material for: Molecular Characterization of Two Totiviruses from the Commensal Yeast Geotrichum candidum
Source: MDPI journal article supplement (doi:10.3390/v15112150), 2023-10-25
Supplement: s1 [file s1]

**Table S1.** Primers used for the RT-PCR amplifications of terminal sequences of the two dsRNAs (GcTV2-Gc6 and GcTV4-Gc6). Each primer was used in combination with primer T4LC.

| DsRNA (virus)         | Primer name | Primer sequence      |
|-----------------------|-------------|----------------------|
| dsRNA1<br>(GcTV2-Gc6) | GcTV2-3F    | CTACATCATGTTGTAGGCGG |
|                       | GcTV2-5R    | ATGTCAAGCTTAACATGACC |
| dsRNA2<br>(GcTV4-Gc6) | GcTV4-3F    | CAACAGCCACACAACTGG   |
|                       | GcTV4-5R    | ACGTTGACTCTGTATCCC   |

**Table S2.** Results of Blastx search (accessed in October 2023) for dsRNA1 (Geotrichum candidum totivirus 2 isolate Gc6) sequence (top 50 hits are shown).

| Virus                                  | Query Cover | E value | Percent Identity | Accession number |
|----------------------------------------|-------------|---------|------------------|------------------|
| Totiviridae sp.                        | 44%         | 0.0     | 97.50%           | WAK80738.1       |
| Totiviridae sp.                        | 44%         | 0.0     | 97.35%           | WAK80740.1       |
| Geotrichum candidum totivirus 2        | 44%         | 0.0     | 95.29%           | UUT40376.1       |
| Totiviridae sp.                        | 46%         | 0.0     | 94.15%           | WAK80739.1       |
| Totiviridae sp.                        | 46%         | 0.0     | 94.15%           | WAK80737.1       |
| Geotrichum candidum totivirus 2        | 52%         | 0.0     | 91.66%           | UUT40377.1       |
| Saccharomyces cerevisiae virus L-A     | 47%         | 0.0     | 57.38%           | NP_620495.1      |
| Saccharomyces cerevisiae virus L-A     | 96%         | 0.0     | 54.60%           | QRN76664.1       |
| Saccharomyces kudriavzevii virus L-A1  | 96%         | 0.0     | 54.60%           | YP_009328931.1   |
| Saccharomyces cerevisiae virus L-A     | 96%         | 0.0     | 54.36%           | QRN76660.1       |
| Saccharomyces cerevisiae virus L-A     | 96%         | 0.0     | 54.36%           | QRN76662.1       |
| Saccharomyces cerevisiae virus L-A-2   | 96%         | 0.0     | 54.36%           | AHF27234.1       |
| Saccharomyces cerevisiae virus L-A     | 96%         | 0.0     | 54.24%           | QRN76658.1       |
| Saccharomyces cerevisiae virus L-A     | 96%         | 0.0     | 54.24%           | NP_620493.1      |
| Saccharomyces cerevisiae virus L-A     | 96%         | 0.0     | 54.24%           | Q87022.2         |
| Saccharomyces paradoxus virus L-A-21   | 96%         | 0.0     | 54.12%           | ATL63180.1       |
| Saccharomyces paradoxus virus L-A-74   | 96%         | 0.0     | 54.12%           | ATL63184.1       |
| Saccharomyces cerevisiae virus L-A-lus | 96%         | 0.0     | 54.12%           | AFQ55381.1       |
| Saccharomyces cerevisiae virus L-A-28  | 96%         | 0.0     | 53.88%           | AMV49327.1       |

| <b>Virus</b>                              | <b>Query Cover</b> | <b>E value</b> | <b>Percent Identity</b> | <b>Accession number</b> |
|-------------------------------------------|--------------------|----------------|-------------------------|-------------------------|
| Saccharomyces paradoxus virus L-A-62      | 96%                | 0.0            | 53.88%                  | ATL63192.1              |
| Saccharomyces paradoxus virus L-A-1143    | 96%                | 0.0            | 53.88%                  | ATL63190.1              |
| Saccharomyces kudriavzevii virus L-A-1082 | 96%                | 0.0            | 53.87%                  | ATL63196.1              |
| Saccharomyces paradoxus virus L-A-4650    | 97%                | 0.0            | 53.79%                  | ATL63186.1              |
| Saccharomyces uvarum virus L-A-10560      | 97%                | 0.0            | 53.67%                  | ATL63194.1              |
| Saccharomyces cerevisiae virus L-A        | 54%                | 0.0            | 53.65%                  | AAA50321.1              |
| Saccharomyces paradoxus virus L-A-1939    | 97%                | 0.0            | 53.55%                  | ATL63188.1              |
| Saccharomyces paradoxus virus L-A-66      | 96%                | 0.0            | 53.17%                  | AYN80723.1              |
| Saccharomyces paradoxus virus L-A-45      | 97%                | 0.0            | 52.84%                  | ATL63182.1              |
| Pichia membranifaciens virus L-A          | 96%                | 0.0            | 52.59%                  | UNY77798.1              |
| Torulaspora delbrueckii virus LA          | 96%                | 0.0            | 52.30%                  | QRN76668.1              |
| Tuber aestivum virus 1                    | 51%                | 0.0            | 52.20%                  | YP_009507833.1          |
| Totiviridae sp.                           | 96%                | 0.0            | 51.69%                  | UHS72452.1              |
| Ambrosiozyma totivirus A                  | 45%                | 0.0            | 50.22%                  | QED43028.1              |
| Poaceae Liege totivirus 6                 | 45%                | 0.0            | 44.15%                  | UVG55931.1              |
| Saccharomyces paradoxus virus L-A-4650    | 42%                | 0.0            | 44.07%                  | ATL63185.1              |
| Saccharomyces paradoxus virus L-A-1143    | 42%                | 0.0            | 44.07%                  | ATL63189.1              |
| Saccharomyces paradoxus virus L-A-62      | 42%                | 0.0            | 44.07%                  | ATL63191.1              |
| Saccharomyces paradoxus virus L-A-1939    | 42%                | 0.0            | 44.07%                  | ATL63187.1              |
| Saccharomyces uvarum virus L-A-10560      | 42%                | 0.0            | 44.07%                  | ATL63193.1              |

| <b>Virus</b>                           | <b>Query Cover</b> | <b>E value</b> | <b>Percent Identity</b> | <b>Accession number</b> |
|----------------------------------------|--------------------|----------------|-------------------------|-------------------------|
| Saccharomyces paradoxus virus L-A-74   | 42%                | 0.0            | 43.92%                  | ATL63183.1              |
| Hubei toti-like virus 2                | 45%                | 0.0            | 43.78%                  | YP_009336496.1          |
| Saccharomyces kudriavzevii virus L-A1  | 42%                | 0.0            | 43.77%                  | YP_009328932.1          |
| Saccharomyces cerevisiae virus L-A-28  | 42%                | 0.0            | 43.62%                  | AMV49326.1              |
| Saccharomyces paradoxus virus L-A-66   | 42%                | 0.0            | 43.62%                  | AYN80722.1              |
| Maize associated totivirus             | 50%                | 0.0            | 43.52%                  | QJD25939.1              |
| Saccharomyces paradoxus virus L-A-21   | 42%                | 0.0            | 43.47%                  | ATL63179.1              |
| Saccharomyces cerevisiae virus L-A     | 42%                | 0.0            | 43.47%                  | QRN76663.1              |
| Saccharomyces cerevisiae virus L-A-lus | 42%                | 0.0            | 43.47%                  | AFQ55380.1              |
| Saccharomyces cerevisiae virus L-A     | 42%                | 0.0            | 43.47%                  | QRN76661.1              |
| Saccharomyces cerevisiae virus L-A     | 42%                | 0.0            | 43.47%                  | QRN76659.1              |

**Table S3.** Results of Blastx search (accessed in October 2023) for dsRNA2 (Geotrichum candidum totivirus 4 isolate Gc6) sequence (top 50 hits are shown).

| <b>Virus</b>                                | <b>Query Cover</b> | <b>E value</b> | <b>Percent Identity</b> | <b>Accession number</b> |
|---------------------------------------------|--------------------|----------------|-------------------------|-------------------------|
| Totiviridae sp.                             | 46%                | 0.0            | 91.69%                  | WAK77686.1              |
| Totiviridae sp.                             | 46%                | 0.0            | 91.69%                  | WAK77295.1              |
| Totiviridae sp.                             | 52%                | 0.0            | 89.24%                  | WAK77685.1              |
| Totiviridae sp.                             | 52%                | 0.0            | 88.86%                  | WAK77294.1              |
| Tuatara cloaca-associated totivirus-3       | 18%                | 8e-123         | 66.79%                  | UUV42637.1              |
| Totiviridae sp.                             | 48%                | 0.0            | 54.47%                  | WAK77495.1              |
| Xian Totiv tick virus 1                     | 49%                | 0.0            | 54.41%                  | UYL95672.1              |
| Totiviridae sp.                             | 35%                | 0.0            | 53.93%                  | WAK77570.1              |
| Totiviridae sp.                             | 39%                | 0.0            | 52.02%                  | WAK77449.1              |
| Malassezia restricta associated totivirus 1 | 45%                | 0.0            | 49.86%                  | CAI9858976.1            |

| <b>Virus</b>                              | <b>Query Cover</b> | <b>E value</b> | <b>Percent Identity</b> | <b>Accession number</b> |
|-------------------------------------------|--------------------|----------------|-------------------------|-------------------------|
| Hanko totivirus 2                         | 23%                | 8e-116         | 49.17%                  | UUV42486.1              |
| Erysiphe necator associated totivirus 7   | 52%                | 0.0            | 48.05%                  | QJW70337.1              |
| Erysiphe necator associated totivirus 6   | 52%                | 0.0            | 47.99%                  | QJW70335.1              |
| Erysiphe necator associated totivirus 8   | 46%                | 0.0            | 47.05%                  | QJW70339.1              |
| Delisea pulchra totivirus IndA            | 31%                | 7e-126         | 45.72%                  | AMB17475.1              |
| Totiviridae sp.                           | 99%                | 0.0            | 45.68%                  | UHS72518.1              |
| Totivirus sp.                             | 28%                | 5e-116         | 45.64%                  | QOQ37362.1              |
| Malassezia globosa associated totivirus 1 | 50%                | 0.0            | 45.44%                  | CAI9858973.1            |
| Scheffersomyces segobiensis virus L       | 99%                | 0.0            | 45.33%                  | YP_009507829.1          |
| Scheffersomyces segobiensis virus L       | 56%                | 0.0            | 45.33%                  | YP_009507831.1          |
| Malassezia sympodialis mycovirus          | 49%                | 0.0            | 45.20%                  | QNJ34609.1              |
| Malassezia sympodialis mycovirus          | 92%                | 0.0            | 45.20%                  | QNJ34610.1              |
| Dali Totiv tick virus 1                   | 49%                | 0.0            | 45.14%                  | UYL95680.1              |
| Erysiphe necator associated totivirus 8   | 52%                | 0.0            | 45.08%                  | WAK77400.1              |
| Totiviridae sp.                           | 24%                | 7e-100         | 44.65%                  | UHS72441.1              |
| Totiviridae sp.                           | 24%                | 5e-96          | 44.53%                  | UHS72410.1              |
| Totiviridae sp.                           | 49%                | 0.0            | 44.21%                  | WAK77568.1              |
| Malassezia restricta virus MrV40L         | 55%                | 0.0            | 43.74%                  | QJA42331.1              |
| Malassezia restricta virus MrV40L         | 98%                | 0.0            | 43.74%                  | QJA42332.1              |
| Totiviridae sp.                           | 51%                | 0.0            | 43.73%                  | WAK77406.1              |
| Totiviridae sp.                           | 51%                | 0.0            | 43.73%                  | WAK77396.1              |
| Totiviridae sp.                           | 44%                | 2e-175         | 43.67%                  | WAK77496.1              |
| Xian Totiv tick virus 1                   | 44%                | 3e-175         | 43.67%                  | UYL95673.1              |
| Erysiphales associated mitovirus 1        | 52%                | 0.0            | 42.21%                  | QIP68035.1              |
| Totiviridae sp.                           | 43%                | 4e-170         | 42.21%                  | UHS72517.1              |
| Scheffersomyces segobiensis virus L       | 43%                | 7e-170         | 41.86%                  | YP_009507830.1          |
| Erysiphales associated totivirus 13       | 52%                | 0.0            | 41.76%                  | QIP68067.1              |

| Virus                                         | Query Cover | E value | Percent Identity | Accession number |
|-----------------------------------------------|-------------|---------|------------------|------------------|
| Poaceae Liege totivirus 8                     | 35%         | 9e-124  | 41.58%           | UVG55935.1       |
| Helianthus annuus leaf-associated totivirus 1 | 31%         | 4e-103  | 40.94%           | UMQ74219.1       |
| Dali Totiv tick virus 1                       | 43%         | 2e-156  | 40.12%           | UYL95681.1       |
| Totiviridae sp.                               | 43%         | 3e-154  | 40.06%           | WAK77397.1       |
| Totiviridae sp.                               | 35%         | 4e-117  | 40.00%           | WAK77555.1       |
| Erysiphe necator associated totivirus 8       | 44%         | 1e-152  | 39.44%           | WAK77401.1       |
| Totiviridae sp.                               | 44%         | 3e-150  | 39.44%           | WAK77567.1       |
| Phakopsora totivirus E                        | 31%         | 3e-95   | 39.18%           | QED42935.1       |
| Erysiphales associated totivirus 1            | 52%         | 0.0     | 39.10%           | QIP68044.1       |
| Erysiphe necator associated totivirus 8       | 44%         | 9e-148  | 38.85%           | QJW70340.1       |
| Malassezia restricta virus MrV40L             | 43%         | 1e-150  | 38.60%           | QJA42330.1       |
| Erysiphe necator associated totivirus 7       | 42%         | 5e-143  | 38.53%           | QJW70338.1       |
| Malassezia sympodialis mycovirus              | 43%         | 1e-148  | 38.20%           | QNJ34608.1       |

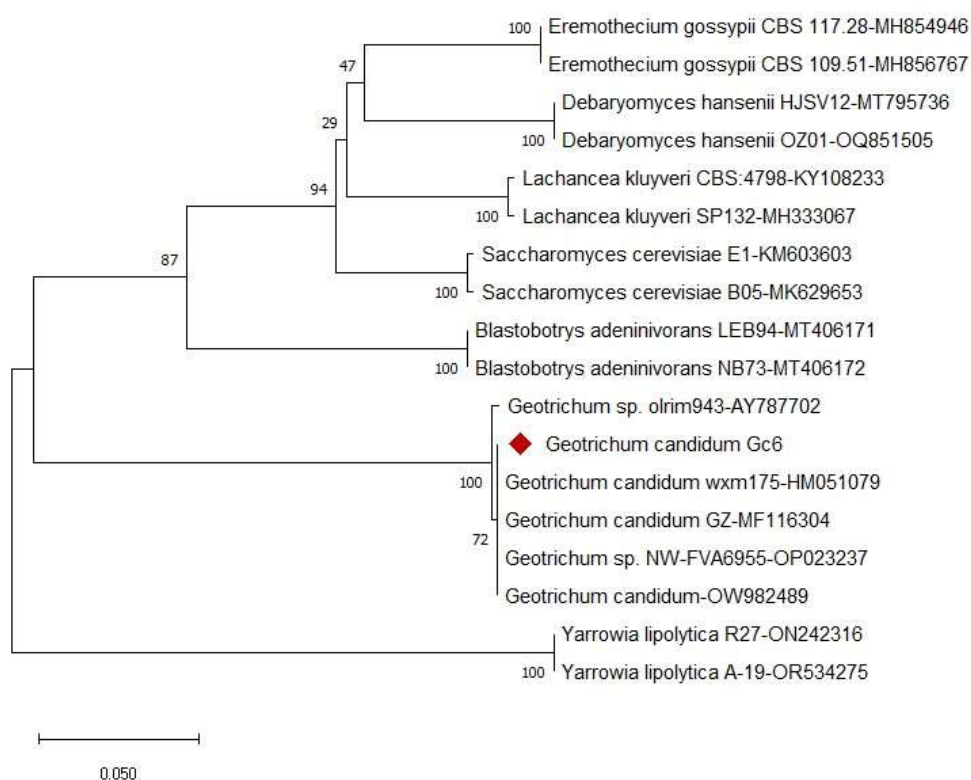

**Figure S1.** Neighbor-joining phylogenetic tree constructed based on partial ITS-5.8s rRNA gene sequence alignment of isolate Gc6 and other members of Saccharomycotina.
